# Supplementary material for: Design and validation of a next generation sequencing assay for hereditary BRCA1 and BRCA2 mutation testing
Source: PeerJ. 2016 Jun 28;4:e2162. doi: 10.7717/peerj.2162 (PMC4928470; doi:10.7717/peerj.2162)
Supplement: Table S1 [file peerj-04-2162-s001.xlsx]

## Sheet: Sheet1
Supplemental Table 1. List of 41 Coriell and 15 BIC Reference Samples
Sample ID	Source
HG00101	Coriell
HG00110	Coriell
HG00119	Coriell
HG00128	Coriell
HG00136	Coriell
HG00150	Coriell
HG00171	Coriell
HG00182	Coriell
HG00251	Coriell
HG00255	Coriell
HG00260	Coriell
HG00266	Coriell
HG00271	Coriell
HG00274	Coriell
HG00280	Coriell
HG00309	Coriell
HG00312	Coriell
HG00327	Coriell
HG00436	Coriell
HG00464	Coriell
HG00512	Coriell
HG00537	Coriell
HG00554	Coriell
HG00580	Coriell
HG00608	Coriell
HG00637	Coriell
HG00641	Coriell
HG00650	Coriell
HG00663	Coriell
HG00692	Coriell
HG00731	Coriell
HG00732	Coriell
NA06994	Coriell
NA07048	Coriell
NA07056	Coriell
NA07357	Coriell
NA10847	Coriell
NA10851	Coriell
NA11829	Coriell
NA11830	Coriell
NA11831	Coriell
NA13705	BIC
NA13715	BIC
NA14090	BIC
NA14094	BIC
NA14170	BIC
NA14622	BIC
NA14623	BIC
NA14624	BIC
NA14626	BIC
NA14634	BIC
NA14636	BIC
NA14637	BIC
NA14638	BIC
NA14639	BIC
NA14684	BIC
