# Supplementary material for: Design and validation of a next generation sequencing assay for hereditary BRCA1 and BRCA2 mutation testing
Source: PeerJ. 2016 Jun 28;4:e2162. doi: 10.7717/peerj.2162 (PMC4928470; doi:10.7717/peerj.2162)
Supplement: Table S4 [file peerj-04-2162-s004.xlsx]

## Sheet: Sheet1
Supplemental Table 4. Mutation-Positive Sample Details
Sample ID	Source	Gene	Variant Type	HGVS and/or Literature Name	Counsyl Clinical Classification	Basis for Classification	ClinVar Variation ID	HGMD ID	PMID
NA13705	BIC	BRCA1	Indel	NM_007294.3:c.3756_3759delGTCT (4-bp del, p.Ser1253Argfs)	Pathogenic	Truncating variant (nonsense, fs) that results in a premature termination codon that is 5' of the theoretical NMD boundary in a gene where LOF is a known disease mechanism; reported in >2 cases; variant is rare in pop. databases	17673	CD941618	8531967, 16847550, 19863560, 22711857, 11802209, 19241424, 19491284, 20104584, 21324516, 12947551, 7894491, 12393792
NA13715	BIC	BRCA1	Indel	NM_007294.3:c.5265_5266insC (1-bp ins, p.Gln1756Profs)	Pathogenic	Truncating variant (nonsense, fs) that results in a premature termination codon that is 5' of the theoretical NMD boundary in a gene where LOF is a known disease mechanism; reported in >2 cases; variant is rare in pop. databases; known founder mutation	17677	CI941841	7894492, 22006311, 15951956, 20345474, 17307836, 21119707, 10447273, 22430266, 20507347, 16541315, 21324516, 8841191, 21503673, 22032251
NA14090	BIC	BRCA1	Indel	NM_007294.3:c.68_69delAG (2-bp del, p.Glu23Valfs)	Pathogenic	Truncating variant (nonsense, fs) that results in a premature termination codon that is 5' of the theoretical NMD boundary in a gene where LOF is a known disease mechanism; reported in >2 cases; variant is rare in pop. databases; known founder mutation	17662	CD951600	23867111, 18594935, 12393792, 16941470, 7894492, 8533757, 8644703, 8807330, 8841191, 9145677
NA14094	BIC	BRCA1	Indel	NM_007294.3:c.1175_1214del40 (40-bp del, p.Leu392Glnfs)	Pathogenic	Truncating variant (nonsense, fs) that results in a premature termination codon that is 5' of the theoretical NMD boundary in a gene where LOF is a known disease mechanism; reported in >2 cases; variant is rare in pop. databases	17665	CG151890	17688236, 7894491, 7894492, 21324516, 23569316, 22333603, 20043088
NA14634	BIC	BRCA1	Indel	NM_007294.3:c.4065_4068delTCAA (4-bp del, p.Asn1355Lysfs)	Pathogenic	Truncating variant (nonsense, fs) that results in a premature termination codon that is 5' of the theoretical NMD boundary in a gene where LOF is a known disease mechanism; reported in >2 cases; variant is rare in pop. databases	17674	CD941619	23175448, 14757871, 24556621, 7894493, 21324516, 17018160, 23633455, 24549055, 23683081, 11802209, 21559243
NA14636	BIC	BRCA1	Indel	NM_007294.3:c.5558dupA (1-bp dup, p.Tyr1853Terfs)	Pathogenic	Truncating variant (nonsense, fs) that results in a premature termination codon that is 5' of the theoretical NMD boundary in a gene where LOF is a known disease mechanism; reported in >2 cases; variant is rare in pop. databases	55628	CI941843	n/a
NA14637	BIC	BRCA1	SNV	NM_007294.3:c.4327C>G (p.Arg1443Gly)	Benign	posterior probability of being deleterious = <6.18×10−4, IARC class 1 (PMID: 21990134); functional studies support weak to no effect on protein function	17676	CM941079	17308087, 25525159, 21990134, 21447777, 23867111, 7894491,
NA14638	BIC	BRCA1	SNV	NM_007294.3:c.213-11T>G (IVS5-11T>G)	Pathogenic	Confirmed segregation with disease in one family, and reported in multiple unrelated affected individuals, experimental evidence shows altered splicing resulting in a PTC	37449	CS941428	7894493, 18284688, 19241424, 18159056, 22505045, 23451180, 18424508
NA14684	BIC	BRCA1	Indel	NM_007294.3:c.798_799delTT (2-bp del, p.Ser267Lysfs)	Pathogenic	Truncating variant (nonsense, fs) that results in a premature termination codon that is 5' of the theoretical NMD boundary in a gene where LOF is a known disease mechanism; reported in >2 cases; variant is rare in pop. databases	37698	CD951604	7493024, 12393792, 177221156, 18159056, 18645608, 20683152, 21603858, 22425665, 23289006,
NA14170	BIC	BRCA2	Indel	NM_000059.3:c.5946delT (1-bp del, p.Ser1982Argfs)	Pathogenic	Truncating variant (nonsense, fs) that results in a premature termination codon that is 5' of the theoretical NMD boundary in a gene where LOF is a known disease mechanism; reported in >2 cases; variant is rare in pop. databases; known founder mutation	9325	CD961857	15695382, 22006311, 22009639, 19188187, 22703879, 23658460, 8673092, 15994883, 8673091, 21324516, 22430266, 9145676, 10570174, 18607349
NA14622	BIC	BRCA2	Indel	NM_000059.3:c.6275_6276delTT (2-bp del, p.Leu2092Profs)	Pathogenic	Truncating variant (nonsense, fs) that results in a premature termination codon that is 5' of the theoretical NMD boundary in a gene where LOF is a known disease mechanism; reported in >2 cases; variant is rare in pop. databases	9318	CD951627	12955716, 22009639, 22006311, 21324516, 20736950, 9585613, 11359068, 8524414, 10433620, 12698193
NA14623	BIC	BRCA2	SNV	NM_000059.3:c.125A>G (p.Tyr42Cys)	Benign	Allele freq >1% in pop. databases	37734	CM970178	n/a
NA14624	BIC	BRCA2	Indel	NM_000059.3:c.5722_5723delCT (2-bp del, p.Leu1908Argfs)	Pathogenic	Truncating variant (nonsense, fs) that results in a premature termination codon that is 5' of the theoretical NMD boundary in a gene where LOF is a known disease mechanism; reported in >2 cases; variant is rare in pop. databases	9320	CD951626	22535016, 21324516, 8665505, 9150172, 18489799, 19353265 , 20104584, 20167696, 20683152, 22798144, 22970155 , 24830819, 24916970
NA14626	BIC	BRCA2	SNV	NM_000059.3:c.9976A>T (p.Lys3326Ter)	Likely Benign	Truncating variant with similar frequencies in cases and controls and observed at high frequencies in population databases; ENIGMA classifies this variant as benign	38266	CM993644	8896551, 20104584 , 11389159, 9971877, 26586665, 15695382
NA14639	BIC	BRCA2	Indel	NM_000059.3:c.6198_6199delTT (2-bp del, p.Ser2067Hisfs)	Pathogenic	Truncating variant (nonsense, fs) that results in a premature termination codon that is 5' of the theoretical NMD boundary in a gene where LOF is a known disease mechanism; reported in >2 cases; variant is rare in pop. databases	52027	CD972081	n/a
Counsyl1	External lab	BRCA1	CNV	del exons 5-14	Pathogenic	multi-exon deletion in a gene where LOF is the disease mechanism; reported in > 2 cases	N/A	CG073810, CG145171	n/a
Counsyl2	External lab	BRCA1	CNV	del exons 5-14	Pathogenic	multi-exon deletion in a gene where LOF is the disease mechanism; reported in > 2 cases	N/A	CG073810, CG145171	n/a
Counsyl3	External lab	BRCA1	CNV	del exons 5-14	Pathogenic	multi-exon deletion in a gene where LOF is the disease mechanism; reported in > 2 cases	N/A	CG073810, CG145171	n/a
Counsyl4	External lab	BRCA1	CNV	del exons 3-5	Pathogenic	multi-exon deletion in a gene where LOF is the disease mechanism; reported in > 2 cases	N/A	CG077725, CG1312404	n/a
Counsyl5	External lab	BRCA1	CNV	del exons 3-5	Pathogenic	multi-exon deletion in a gene where LOF is the disease mechanism; reported in > 2 cases	N/A	CG077725, CG1312404	n/a
Counsyl6	External lab	BRCA1	CNV	del exons 3-5	Pathogenic	multi-exon deletion in a gene where LOF is the disease mechanism; reported in > 2 cases	N/A	CG077725, CG1312404	n/a
Counsyl7	External lab	BRCA1	CNV	del exons 11-13	Likely Pathogenic	multi-exon deletion in a gene where LOF is the disease mechanism; reported in 1 case	N/A	N/A	25176351
Counsyl8	External lab	BRCA1	CNV	del exons 18-19	Pathogenic	multi-exon deletion in a gene where LOF is the disease mechanism; reported in > 2 cases	N/A	CG073809, CG035158, CG146559, CG104392,	n/a
Counsyl9	External lab	BRCA1	CNV	del exons 1-14	Likely Pathogenic	multi-exon deletion in a gene where LOF is the disease mechanism; reported in 1 case	N/A	CG104258	n/a
Counsyl10	External lab	BRCA1	CNV	dup exon 8	Uncertain significance	location and orientation is not determined; functional significance is unknown	N/A	CN152157	n/a
Counsyl11	External lab	BRCA1	CNV	dup exon 1, del exon 2	Likely Pathogenic	exon deletion encompassing initiation codon in a gene where LOF is the disease mechanism; no reported cases	N/A	N/A	n/a
Counsyl12	External lab	BRCA1	CNV	dup exon 13	Likely Pathogenic	consistent with a known founder mutation; however structure and location is not known	N/A	CN104381, CN093554, CN995038, CN63812, CN035372, CN129972	16551709, 9915971, 10827109, 21281505, 12960223, 22544547, 12698193
Counsyl13	External lab	BRCA1	CNV	dup exon 8	Uncertain significance	location and orientation is not determined; functional significance is unknown	N/A	CN152157	n/a
Counsyl14	Counsyl lab	BRCA2	CNV	dup exon 1-3	Uncertain significance	location and orientation is not determined; functional significance is unknown	N/A	N/A	n/a
Counsyl15	Counsyl lab	BRCA1	CNV	dup exon 13	Likely Pathogenic	consistent with a known founder mutation; however breakpoints are unknown	N/A	CN104381, CN093554, CN995038, CN63812, CN035372, CN129972	16551709, 9915971, 10827109, 21281505, 12960223, 22544547, 12698193
Counsyl16	Counsyl lab	BRCA2	CNV	del exon 3	Likely Pathogenic	exon deletion in a gene where LOF is the disease mechanism; reported in 1 case	N/A	CG145174	24522996
Counsyl17	Counsyl lab	BRCA2	CNV	del exon 25-27	Likely Pathogenic	multi-exon deletion in a gene where LOF is the disease mechanism	N/A	CG159628	n/a
Counsyl18	Counsyl lab	BRCA1	CNV	del exon 22	Likely Pathogenic	exon deletion in a gene where LOF is the disease mechanism	N/A	CG0910164, CG973417, CG973700, CG111174,	n/a
Counsyl19	Counsyl lab	BRCA2	CNV	del exon 15	Likely Pathogenic	exon deletion in a gene where LOF is the disease mechanism	N/A	N/A	n/a
Counsyl20	Counsyl lab	BRCA1	CNV	del exon 13-15	Likely Pathogenic	multi-exon deletion in a gene where LOF is the disease mechanism	N/A	CG149045, CG072660, CG146396, CG084357, CG098634, CG015438, CG104257, CG078006	n/a
Counsyl21	Counsyl lab	BRCA1	CNV	del exon 12	Likely Pathogenic	exon deletion in a gene where LOF is the disease mechanism; reported in 1 case	N/A	CG129139	22762150
Counsyl22	Counsyl lab	BRCA1	CNV	del exon 1-2	Likely Pathogenic	multi-exon deletion in a gene where LOF is the disease mechanism	N/A	CG973415, CG136869, CG146556, CG106858, CG109770, CG994824	n/a
Counsyl23	Counsyl lab	BRCA1	Indel	NM_007294.3:c.1175_1214del40 (40-bp del, p.Leu392Glnfs)	Pathogenic	Truncating variant (nonsense, fs) that results in a premature termination codon that is 5' of the theoretical NMD boundary in a gene where LOF is a known disease mechanism; reported in >2 cases; variant is rare in pop. databases	17665	CG151890	17688236, 7894491, 7894492, 21324516, 23569316, 22333603, 20043088
Counsyl24	Counsyl lab	BRCA1	Indel	NM_007294.3:c.4964_4982del19 (19-bp del, p.Ser1655Tyrfs)	Pathogenic	Truncating variant (nonsense, fs) that results in a premature termination codon that is 5' of the theoretical NMD boundary in a gene where LOF is a known disease mechanism; reported in >2 cases; variant is rare in pop. databases	37616	CD984011	17221156, 18159056, 11938448, 18980973, 11462242, 9145677, 22711857, 16847550
Counsyl25	Counsyl lab	BRCA1	Indel	NM_007294.3:c.4807_4821del15 (15-bp del, p.Pro1603_Val1607del)	Uncertain significance	Insufficient evidence (no reported cases, no functional data)	37611	N/A	n/a
Counsyl26	Counsyl lab	BRCA1	Indel	NM_007294.3:c.3481_3491del11 (11-bp del, p.Glu1161Phefs)	Pathogenic	Truncating variant (nonsense, fs) that results in a premature termination codon that is 5' of the theoretical NMD boundary in a gene where LOF is a known disease mechanism; reported in >2 cases; variant is rare in pop. databases	17684	CD951618	25880076, 9150149, 10196379, 22006311, 9760198, 15131401, 12955716, 7611277
Counsyl27	Counsyl lab	BRCA1	Indel	NM_007294.3:c.815_824dup10 (10-bp dup, p.Thr276Alafs)	Pathogenic	Truncating variant (nonsense, fs) that results in a premature termination codon that is 5' of the theoretical NMD boundary in a gene where LOF is a known disease mechanism; reported in >2 cases; variant is rare in pop. databases	55723	CI972550	10417303, 22006311, 15533909, 20838878, 19241424
Counsyl28	Counsyl lab	BRCA2	Indel	NM_000059.3:c.10095del1ins11 (11-bp ins, p.S3366Nfs*4)	Likely benign	PTC not subject to NMD; no functional domains lost; no downstream truncating pathogenic variants	125926	CX033308	22505045
Counsyl29	Counsyl lab	BRCA2	Indel	NM_000059.3:c.8736_8744del9 (9-bp del, p.D2913_A2915del)	Uncertain significance	Insufficient evidence	N/A	CD144236	n/a
Counsyl30	Counsyl lab	BRCA1	Indel	NM_007294.3:c.3706_3713del8 (8-bp del, p.N1236Ffs*5)	Likely Pathogenic	Truncating variant (nonsense, fs) that results in a premature termination codon that is 5' of the theoretical NMD boundary in a gene where LOF is a known disease mechanism; reported in 1 case; variant is rare in pop. databases	N/A	CD099461	19491284
Counsyl31	Counsyl lab	BRCA1	Indel	NM_007294.3:c.2998_3003del6 (6-bp del, p.E1000_E1001del)	Uncertain significance	Insufficient evidence (no reported cases, no functional data)	54743	N/A	n/a
Counsyl32	Counsyl lab	BRCA2	Indel	NM_000059.3:c.4446_4451dup6 (6-bp dup, p.E1482_T1483dup)	Uncertain significance	Insufficient evidence (no reported cases, no functional data)	216854	N/A	n/a
