# Supplementary material for: Design and validation of a next generation sequencing assay for hereditary BRCA1 and BRCA2 mutation testing
Source: PeerJ. 2016 Jun 28;4:e2162. doi: 10.7717/peerj.2162 (PMC4928470; doi:10.7717/peerj.2162)
Supplement: Table S5 [file peerj-04-2162-s005.xlsx]

## Sheet: Intra-and Inter-run SNVs
Supplemental Table 5. Inter- and Intra-run Reproducibility Assessment for SNVs
Sample	Replicates	Expected Variants	Called Variants	Score, %
Counsyl1	2	160	160	100
Counsyl2	2	160	160	100
Counsyl3	2	138	138	100
Counsyl4	2	138	138	100
Counsyl5	2	152	152	100
Counsyl6	2	152	152	100
Counsyl7	2	140	140	100
Counsyl8	2	140	140	100
Counsyl9	3	231	231	100
Counsyl10	3	234	234	100
Counsyl11	3	231	231	100

## Sheet: Intra- and inter-run indels
Supplemental Table 5. Inter- and Intra-Run Reproducibility Assessment for Indels
Sample	Replicates	Expected Variants	Called Variants	Score, %
NA13705	9	0	0	100
NA13715	9	0	0	100
NA14090	9	0	0	100
NA14094	9	9	9	100
NA14170	9	9	9	100
NA14622	9	9	9	100
NA14623	9	9	9	100
NA14624	9	9	9	100
NA14626	9	9	9	100
NA14634	9	9	9	100
NA14636	9	0	0	100
NA14637	9	9	9	100
NA14638	9	9	9	100
NA14639	9	9	9	100
NA14684	9	9	9	100

## Sheet: Intra- and inter-run CNVs
Supplemental Table 5. Inter- and Intra-Run Reproducibility Assessment for CNVs
Sample	Replicates	Expected Call	Observed Call	Score, %
NA13705	3	150	150	100
NA13715	3	150	150	100
NA14090	3	150	150	100
NA14094	3	150	150	100
NA14170	3	150	150	100
NA14622	3	150	150	100
NA14623	3	150	150	100
NA14624	3	150	150	100
NA14626	3	150	150	100
NA14634	3	150	150	100
NA14636	3	150	150	100
NA14637	3	150	150	100
NA14638	3	150	150	100
NA14639	3	150	150	100
NA14684	3	150	150	100

## Sheet: Blood vs Saliva
Blood vs Saliva SNVs
Sample	Replicates	Expected Variants	Called Variants	Score, %
BvS-1	6	456	456	100
BvS-2	6	462	462	100
BvS-3	6	456	456	100
BvS-4	6	462	462	100
BvS-5	6	456	456	100
BvS-6	6	462	462	100
BvS-7	6	456	456	100
Blood vs Saliva CNVs
Sample	Replicates	Expected Variants	Called Variants	Score, %
BvS-1	6	300	300	100
BvS-2	6	300	300	100
BvS-3	6	300	300	100
BvS-4	6	300	300	100
BvS-5	6	300	300	100
BvS-6	6	300	300	100
BvS-7	6	300	300	100
